# Supplementary material for: Impact of Sitting Time and Vigorous Leisure-Time Activity on Infertility in Reproductive age U.S. Women
Source: Research Square preprint supplement (doi:10.21203/rs.3.rs-6712960/v1), 2025-06-12
Supplement: Supplementary file 1 [file d042234146797a30e8387a70.docx]

**Data Supplement**

**Table S1. Characteristics of included women and those excluded for study participants in NHANES 2013-2018, weighted [mean (95% CI) or N (%)]**

|  | | |  |
| --- | --- | --- | --- |
| Characteristic | Excluded participants(n=1258) | Included participants(n=3065) | p value |
| **Survey cycle** |  |  | 0.65 |
| 2013-2014 | 459 (36.5%) | 1,089 (35.5%) |  |
| 2015-2016 | 433 (34.4%) | 1,041 (34.0%) |  |
| 2017-2018 | 366 (29.1%) | 935 (30.5%) |  |
| **Age (years)** | 28.25 (9.46) | 32.0 (7.50) | <0.001 |
| **Sampling season** |  |  | 0.65 |
| May 1 through October 31 | 548 (50.7%) | 1,582 (51.6%) |  |
| November 1 through April 30 | 532 (49.3%) | 1,483 (48.4%) |  |
| **Family income to poverty ratio** | |  | <0.001 |
| Low | 491 (45.3%) | 1,018 (36.2%) |  |
| Medium | 366 (33.8%) | 1,041 (37.0%) |  |
| High | 226 (20.9%) | 753 (26.8%) |  |
| **Race/ethnicity** |  |  | 0.003 |
| Non-Hispanic White | 344 (27.3%) | 1,001 (32.7%) |  |
| Non-Hispanic Black | 279 (22.2%) | 674 (22.0%) |  |
| Other Hispanic | 154 (12.2%) | 316 (10.3%) |  |
| Other, including multiracial | 481 (38.2%) | 1,074 (35.0%) |  |
| **Education** |  |  | 0.076 |
| Middle school | 101 (13.9%) | 310 (10.7%) |  |
| High school | 153 (21.0%) | 591 (20.3%) |  |
| College degree | 276 (37.9%) | 1,141 (39.3%) |  |
| College graduate or above | 199 (27.3%) | 865 (29.8%) |  |
| **BMI** |  |  | <0.001 |
| Underweight | 41 (3.9%) | 73 (2.4%) |  |
| Normal weight | 379 (36.1%) | 981 (32.2%) |  |
| Overweight | 262 (24.9%) | 742 (24.4%) |  |
| Obesity | 369 (35.1%) | 1,246 (41.0%) |  |
| **Infertility** |  |  | <0.001 |
| No | 1,048 (97.0%) | 2,666 (87.0%) |  |
| Yes | 32 (3.0%) | 399 (13.0%) |  |
| **Smoking status** |  |  | 0.59 |
| non-smoke | 805 (78.3%) | 2,373 (77.4%) |  |
| smoke | 223 (21.7%) | 692 (22.6%) |  |
| **Daily sitting time(hours)** |  |  | 0.003 |
| <4 | 261 (21.2%) | 755 (24.6%) |  |
| 4 to <6 | 275 (22.3%) | 720 (23.5%) |  |
| 6- ≤8 | 421 (34.1%) | 876 (28.6%) |  |
| >8 | 277 (22.4%) | 714 (23.3%) |  |
| Data are presented as n (%) or mean (SE). | |  |  |
| P-value was calculated by the Rao–Scott Chi-squared test and t-test for categorical and continuous variables, respectively. | | | |

**Table S2 Stratified logistic regression analysis to identify age that modify the correlation between daily sitting time and infertility, weighted**

|  | <=35 years old（n=1882） | |  |
| --- | --- | --- | --- |
|  | Crude model | Adjusted model | p for interaction |
|  | OR(95%CI) | OR(95%CI) | |
| Daily sitting time(hours) | |  | >0.05 |
| ＜4 | Reference | Reference |  |
| 4-＜6 | 0.91（0.57-1.47） | 1.28（0.65-2.50） | |
| 6- ≤8 | 1.03（0.59-1.82） | 1.37（0.69-2.75） | |
| >8 | 1.01（0.56-1.83） | 1.24（0.59-2.62） | |
| p for trend | 0.87 | 0.52 |  |
|  |  |  |  |
|  | >35 years old（n=1183） | |  |
|  | Crude model | Adjusted model | p for interaction |
|  | OR(95%CI) | OR(95%CI) | |
| Daily sitting time(hours) | |  | <0.05 |
| ＜4 | Reference | Reference |  |
| 4-＜6 | 1.02（0.60-1.74） | 1.37（0.68-2.74） | |
| 6- ≤8 | 1.23（0.79-1.91） | 1.72（0.95-3.11） | |
| >8 | 1.72（1.03-2.88） | 2.04（0.99-4.18） | |
| p for trend | 0.02 | 0.03 |  |

**Table S3 a. Sensitivity analyses of the associations between daily sitting time and infertility according to vigorous leisure-time physical activity with additional adjustment for levels of serum cotinine.**

|  | All | | VLTPA | | NO VLTPA | | P interaction-value |
| --- | --- | --- | --- | --- | --- | --- | --- |
|  | Crude model | Adjusted model | Crude model | Adjusted model | Crude model | Adjusted model | for adjusted model |
|  | OR(95%CI) | OR(95%CI) | OR(95%CI) | OR(95%CI) | OR(95%CI) | OR(95%CI) |  |
| Daily sitting time(hours) | |  |  |  |  |  | <0.05 |
| ＜4 | Reference | Reference | Reference | Reference | Reference | Reference |  |
| 4-＜6 | 0.91（0.65-1.28） | 1.28（0.78-2.08） | 0.61(0.32-1.15) | 0.67(0.31-1.46) | 1.15(0.73-1.81) | 1.26(0.78-2.02) |  |
| 6- ≤8 | 1.07（0.76-1.49） | **1.59（1.07-2.36）** | 0.45(0.18-1.12) | 0.46(0.17-1.23) | **1.57(1.10-2.22)** | **1.58(1.09-2.28)** |  |
| >8 | 1.31（0.96-1.78） | 1.51（0.90-2.54） | 0.91(0.46-1.80) | 0.82(0.36-1.87) | **1.63(1.01-2.63)** | 1.54(0.92-2.56) |  |
| p for trend | 0.03 | 0.04 | 0.62 | 0.46 | 0.01 | 0.04 |  |

VLTPA: Vigorous leisure-time physical activity

Adjusted for age, race/ethnicity, body mass index (BMI), family income to poverty ratio, smoking status, serum cotinine levels;

Tests for linear trend were conducted by modelling categories of daily sitting times ordinal variables using the median values within each category.

**Table S3 b. Sensitivity analyses of the associations between daily sitting time and infertility according to vigorous leisure-time physical activity with additional adjustment for marital status and dietary index.**

|  | All | | VLTPA | | NO VLTPA | | P interaction-value |
| --- | --- | --- | --- | --- | --- | --- | --- |
|  | Crude model | Adjusted model | Crude model | Adjusted model | Crude model | Adjusted model | for adjusted model |
|  | OR(95%CI) | OR(95%CI) | OR(95%CI) | OR(95%CI) | OR(95%CI) | OR(95%CI) |  |
| Daily sitting time(hours) | |  |  |  |  |  | <0.05 |
| ＜4 | Reference | Reference | Reference | Reference | Reference | Reference |  |
| 4-＜6 | 0.91（0.65-1.28） | 1.25（0.77-2.03） | 0.61(0.32-1.15) | 0.70(0.30-1.65) | 1.15(0.73-1.81) | 1.22(0.77-1.95) |  |
| 6- ≤8 | 1.07（0.76-1.49） | **1.66（1.11-2.49）** | 0.45(0.18-1.12) | 0.52(0.20-1.38) | **1.57(1.10-2.22)** | **1.62(1.11-2.37)** |  |
| >8 | 1.31（0.96-1.78） | 1.59（0.95-2.66） | 0.91(0.46-1.80) | 0.96(0.43-2.13) | **1.63(1.01-2.63)** | 1.59(0.97-2.63) |  |
| p for trend | 0.03 | 0.03 | 0.62 | 0.73 | 0.01 | 0.02 |  |

VLTPA: Vigorous leisure-time physical activity

Adjusted for age, race/ethnicity, body mass index (BMI), family income to poverty ratio, smoking status, serum cotinine levels, marital status and dietary index;

Tests for linear trend were conducted by modelling categories of daily sitting times ordinal variables using the median values within each category.

**Table S3 c. Sensitivity analyses of the associations between daily sitting time and infertility according to vigorous leisure-time physical activity with additional adjustment for age at menarche and pregnancy history.**

|  | All | | VLTPA | | NO VLTPA | | P interaction-value |
| --- | --- | --- | --- | --- | --- | --- | --- |
|  | Crude model | Adjusted model | Crude model | Adjusted model | Crude model | Adjusted model | for adjusted model |
|  | OR(95%CI) | OR(95%CI) | OR(95%CI) | OR(95%CI) | OR(95%CI) | OR(95%CI) |  |
| Daily sitting time(hours) | |  |  |  |  |  | <0.05 |
| ＜4 | Reference | Reference | Reference | Reference | Reference | Reference |  |
| 4-＜6 | 0.92（0.65-1.28） | 1.26（0.77-2.06） | 0.61(0.32-1.15) | 0.69(0.29-1.63) | 1.15(0.73-1.81) | 1.27(0.79-2.04) |  |
| 6- ≤8 | 1.07（0.77-1.49） | **1.71（1.15-2.53）** | 0.45(0.18-1.12) | 0.47(0.17-1.29) | **1.57(1.10-2.22)** | **1.74(1.21-2.51)** |  |
| >8 | 1.31（0.96-1.78） | 1.62（0.96-2.73） | 0.91(0.46-1.80) | 0.88(0.39-2.01) | **1.63(1.01-2.63)** | **1.69(1.03-2.78)** |  |
| p for trend | 0.03 | 0.02 | 0.62 | 0.55 | 0.01 | 0.01 |  |

VLTPA: Vigorous leisure-time physical activity

Adjusted for age, race/ethnicity, body mass index (BMI), family income to poverty ratio, smoking status, serum cotinine levels, marital status, dietary index, age at menarche and pregnancy history;

Tests for linear trend were conducted by modelling categories of daily sitting times ordinal variables using the median values within each category.
